# Supplementary material for: Transcription and splicing dynamics during early Drosophila development
Source: PubMed Central journal article supplement (PMC8906543; doi:10.1261/rna.078933.121), 2022-02
Supplement: supp_078933.121_Supplemental_Fig_S1.pdf [file supp_078933.121_Supplemental_Fig_S1.pdf]

**A**

| Dataset             | Raw reads  | Uniquely Mapped after Merge |
|---------------------|------------|-----------------------------|
| Early_2-3h_S5P_rep1 | 62,891,575 | 12,959,070                  |
| Early_2-3h_S5P_rep2 | 56,917,697 | 3,610,607                   |
| Late_4-6h_S5P_rep1  | 65,865,258 | 21,564,673                  |
| Late_4-6h_S5P_rep2  | 75,909,131 | 27,375,998                  |
| Late_4-6h_S5P_rep3  | 71,923,876 | 11,987,034                  |
| Late_4-6h_S2P_rep1  | 77,838,463 | 38,595,780                  |
| Late_4-6h_S2P_rep2  | 64,862,996 | 23,137,529                  |
| Late_4-6h_S2P_rep3  | 76,719,886 | 17,912,504                  |

**B**

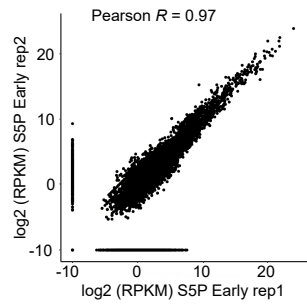

**C**

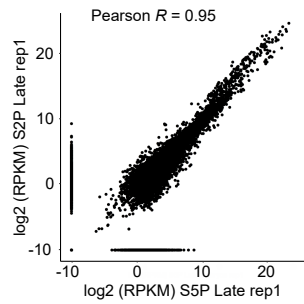

**D**

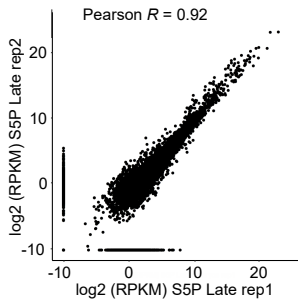

**E**

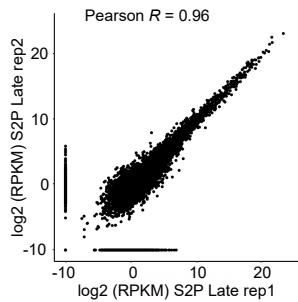

**F**

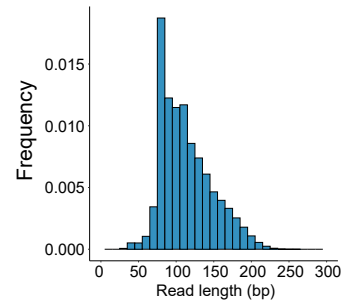

**G**

| Dataset             | Number of nascent reads | Nascent reads / Uniquely mapped reads (%) |
|---------------------|-------------------------|-------------------------------------------|
| Early_2-3h_S5P_rep1 | 7,984,411               | 61.6                                      |
| Early_2-3h_S5P_rep2 | 2,430,876               | 67.3                                      |
| Late_4-6h_S5P_rep1  | 13,413,045              | 62.2                                      |
| Late_4-6h_S5P_rep2  | 13,777,880              | 50.3                                      |
| Late_4-6h_S5P_rep3  | 8,505,056               | 71.0                                      |
| Late_4-6h_S2P_rep1  | 23,153,659              | 60.0                                      |
| Late_4-6h_S2P_rep2  | 12,926,707              | 55.9                                      |
| Late_4-6h_S2P_rep3  | 10,356,743              | 57.8                                      |

**H**

| Dataset             | min | mean  | max | 25th percentile | 50th percentile | 75th percentile |
|---------------------|-----|-------|-----|-----------------|-----------------|-----------------|
| Early_2-3h_S5P_rep1 | 35  | 99.6  | 293 | 74              | 81              | 119             |
| Early_2-3h_S5P_rep2 | 35  | 94.3  | 293 | 72              | 81              | 110             |
| Late_4-6h_S5P_rep1  | 35  | 114.2 | 293 | 86              | 108             | 135             |
| Late_4-6h_S5P_rep2  | 35  | 102.0 | 294 | 80              | 87              | 119             |
| Late_4-6h_S5P_rep3  | 35  | 88.4  | 294 | 76              | 81              | 89              |
| Late_4-6h_S2P_rep1  | 35  | 107.0 | 294 | 81              | 96              | 128             |
| Late_4-6h_S2P_rep2  | 35  | 111.1 | 294 | 81              | 102             | 132             |
| Late_4-6h_S2P_rep3  | 35  | 109.0 | 293 | 83              | 105             | 130             |

**Supplemental Fig. S1.** (A) For each *d*NET-seq library prepared, the number of total reads and of uniquely aligned reads is indicated. (B) Density of uniquely aligned reads per gene (RPKM in log<sub>2</sub> scale) for two *d*NET-seq/S5P biological replicates from early embryos (Pearson's correlation,  $R = 0.97$ ). (C) Density of uniquely aligned reads per gene (RPKM in log<sub>2</sub> scale) from late embryos analysed by *d*NET-seq/S5P and *d*NET-seq/S2P (Pearson's correlation,  $R = 0.95$ ). (D, E) Density of uniquely aligned reads per gene (RPKM in log<sub>2</sub> scale) for two *d*NET-seq/S5P and *d*NET-seq/S2P biological replicates from late embryos (Pearson's correlation,  $R = 0.92$ ;  $R = 0.96$ ). (F) Histogram of the read lengths in *d*NET-seq/S5P data from late embryos. (G) For each *d*NET-seq library generated, the number of uniquely aligned reads corresponding to nascent transcripts is indicated. (H) Length of sequenced nascent RNA (in nucleotides).
