# Supplementary material for: Transcription and splicing dynamics during early Drosophila development
Source: PubMed Central journal article supplement (PMC8906543; doi:10.1261/rna.078933.121), 2022-02
Supplement: supp_078933.121_Supplemental_Fig_S2.pdf [file supp_078933.121_Supplemental_Fig_S2.pdf]

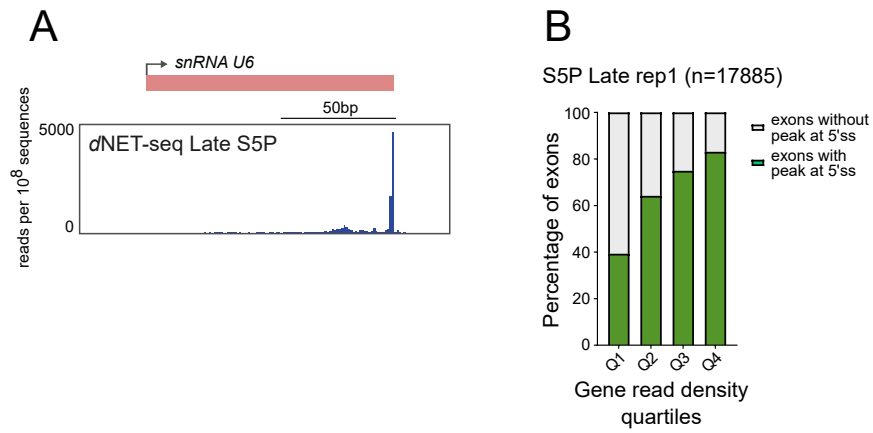

**Supplemental Fig. S2.** (A) *dNET-seq/S5P* profile over the U6 snRNA gene in the late dataset (replicate 1). (B) Frequency of peaks corresponding to splicing intermediates (green) detected by *dNET-seq/S5P* on exons of genes expressed in late embryos. Genes were grouped into quartiles (Q) based on their *dNET-seq* read density.
