# Supplementary material for: Transcription and splicing dynamics during early Drosophila development
Source: PubMed Central journal article supplement (PMC8906543; doi:10.1261/rna.078933.121), 2022-02
Supplement: supp_078933.121_Supplemental_Fig_S3.pdf [file supp_078933.121_Supplemental_Fig_S3.pdf]

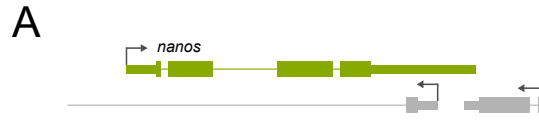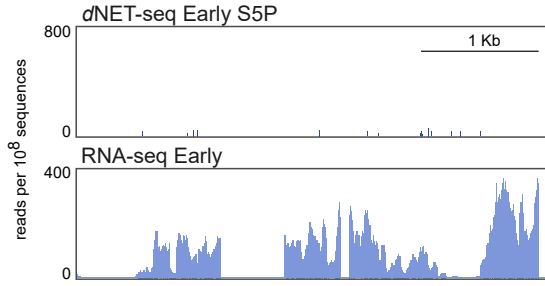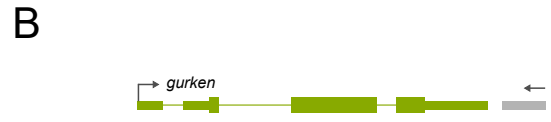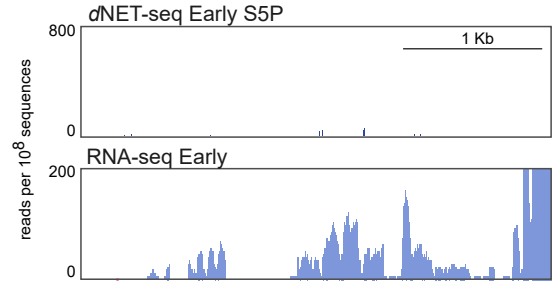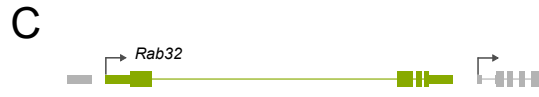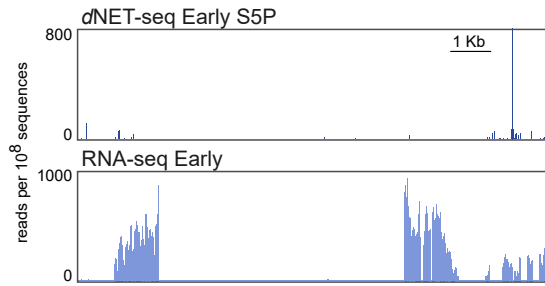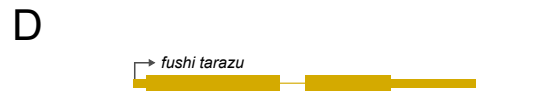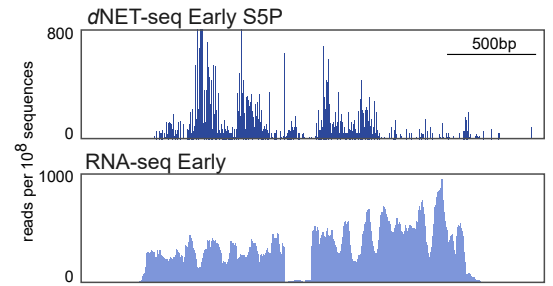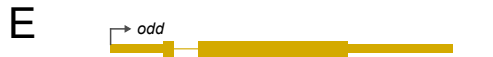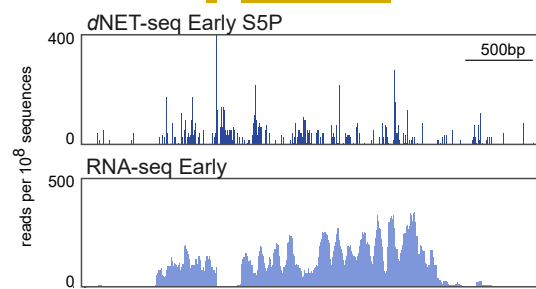

**F** S5P early replicate 2

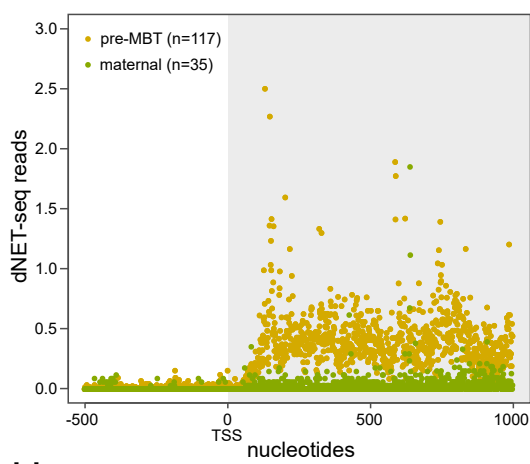

**G** S2P late

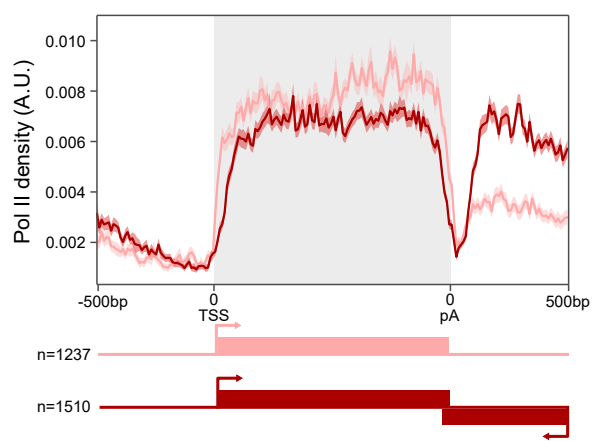

**H**

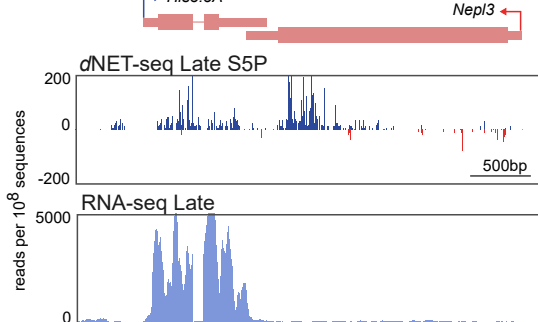

**I**

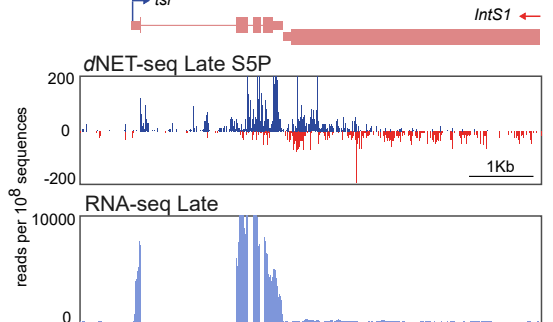

**Supplemental Fig. S3.** (A-C) *d*NET-seq/S5P and RNA-seq profiles over maternal genes in early embryos: *nanos* (A), *gurken* (B), and *Rab32* (C). (D-E) *d*NET-seq/S5P and RNA-seq profiles over pre-MBT genes in early embryos: (D) *fushi tarazu* and *odd skipped* (*odd*) (E). (F) Meta-analysis of *d*NET-seq/S5P mean read density around the transcription start site (TSS) in maternal and pre-MBT genes (replicate 2). (G) Normalized metagene analysis in arbitrary units (A.U.). The *d*NET-seq/S2P signal over transcriptionally active genes in late embryos is depicted along the normalized gene length (grey background), as well as 500 bp upstream of the transcription start site (TSS) and 500 bp downstream of the polyadenylation (pA) site. The signal over genes that have the 3' UTR overlapped by an antisense gene is depicted in dark red, while the signal over genes with no other genes within 500 bp is depicted in light red. (H-I) *d*NET-seq/S5P and RNA-seq profiles over MBT genes in late embryos: *His3.3A* (H) and *twinstar* (*tsr*) (I). Reads that aligned to the positive strand are in blue, and reads that aligned to the negative strand are in red. The direction of transcription is indicated by an arrow.
