# Supplementary material for: Transcription and splicing dynamics during early Drosophila development
Source: PubMed Central journal article supplement (PMC8906543; doi:10.1261/rna.078933.121), 2022-02
Supplement: supp_078933.121_Supplemental_Fig_S5.pdf [file supp_078933.121_Supplemental_Fig_S5.pdf]

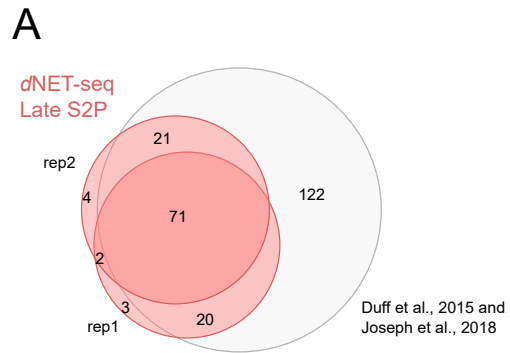

**Supplemental Fig. S5. (A)** Venn diagram comparing RPs identified in two *dNET-seq/S2P* biological replicates and in previously reported studies (Joseph et al. 2018; Duff et al. 2015).
