# Supplementary material for: Transcription and splicing dynamics during early Drosophila development
Source: PubMed Central journal article supplement (PMC8906543; doi:10.1261/rna.078933.121), 2022-02
Supplement: supp_078933.121_Supplemental_Fig_S6.pdf [file supp_078933.121_Supplemental_Fig_S6.pdf]

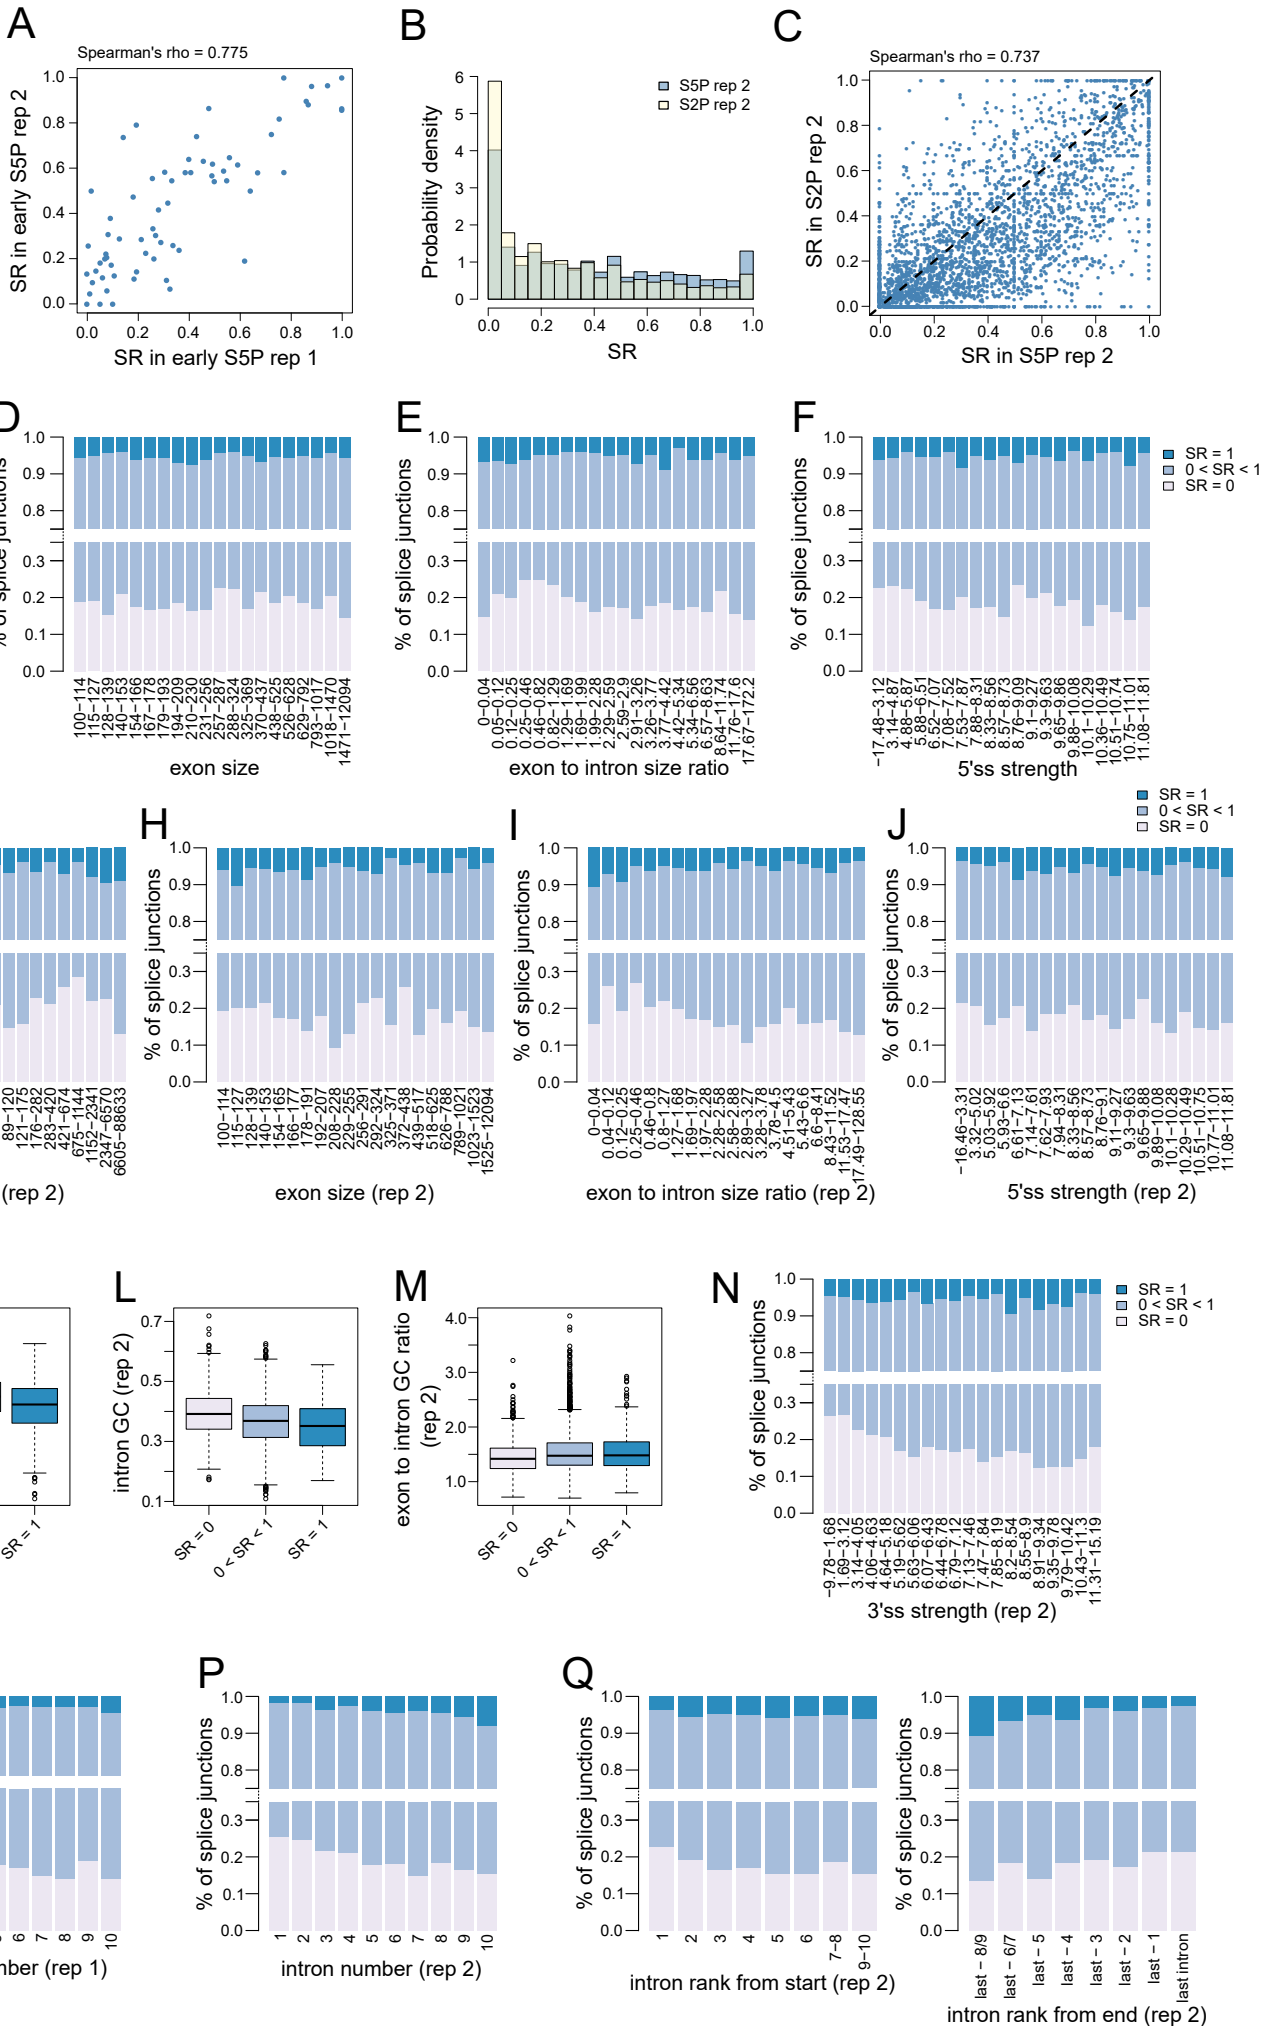

**Supplemental Fig. S6.** In all panels, unless otherwise specified, only introns from transcriptionally active genes where the downstream exon is a fully coding internal exon at least 100 nt long were included. In addition, enough spliced/unspliced reads had to end within the first 100 exonic nucleotides that obtaining a splicing ratio (SR) of 0 or 1 by chance alone was highly unlikely (see the Methods section for details). For genes expressed in late embryos, this threshold was 10 reads for both replicates. For pre-MBT genes, it was 14 for replicate 1 and 9 for replicate 2. For S2P, a threshold of 10 was used for better comparability with S5P data. (A) SR values estimated in two biological replicates of *d*NET-seq/S5P datasets for pre-MBT genes in early embryos (Spearman correlation,  $\rho = \sim 0.775$ ,  $P \sim 1.348 \times 10^{-14}$ ). (B) Distribution of SR values for *d*NET-seq/S5P ( $N = 4510$ ) and *d*NET-seq/S2P ( $N = 4373$ ). (C) SR values estimated in replicate 2 of *d*NET-seq/S5P and *d*NET-seq/S2P from late embryos (Spearman correlation,  $\rho = \sim 0.737$ ,  $P < 2.2 \times 10^{-16}$ ;  $N = 3295$ ). (D-Q) SR values for *d*NET seq/S5P data (replicate 1 and 2) plotted out against several gene architecture parameters. For sample sizes and statistical tests, see Supplementary Table 1. In (D-J, N-Q), the bin ranges have been set so that intron numbers would be as equal possible between bins.
